# Supplementary material for: The Wellbeing Thermometer in cancer patients: a validation study
Source: Research Square preprint supplement (doi:10.21203/rs.3.rs-3156056/v1), 2023-07-17

**Online Resource 1**  
**The Wellbeing Thermometer in cancer patients: a validation study**

Marios Adamou<sup>1\*</sup>, Okezie Uche-Ikonne<sup>2</sup>, Konstantinos Kamposioras<sup>2</sup>

<sup>1</sup>School of Human and Health Sciences, Queensgate, University of Huddersfield,  
Huddersfield HD1 3DH, United Kingdom

<sup>2</sup>The Christie NHS Foundation Trust, Manchester M20 4BX, UK

\*Author for correspondence: [m.adamou@hud.ac.uk](mailto:m.adamou@hud.ac.uk)

Submitted to: Journal of Cancer Survivorship

Figure S1. Correlogram for matched ID scores by cohort (n=41)

A. Cohort 1 Timepoint 1

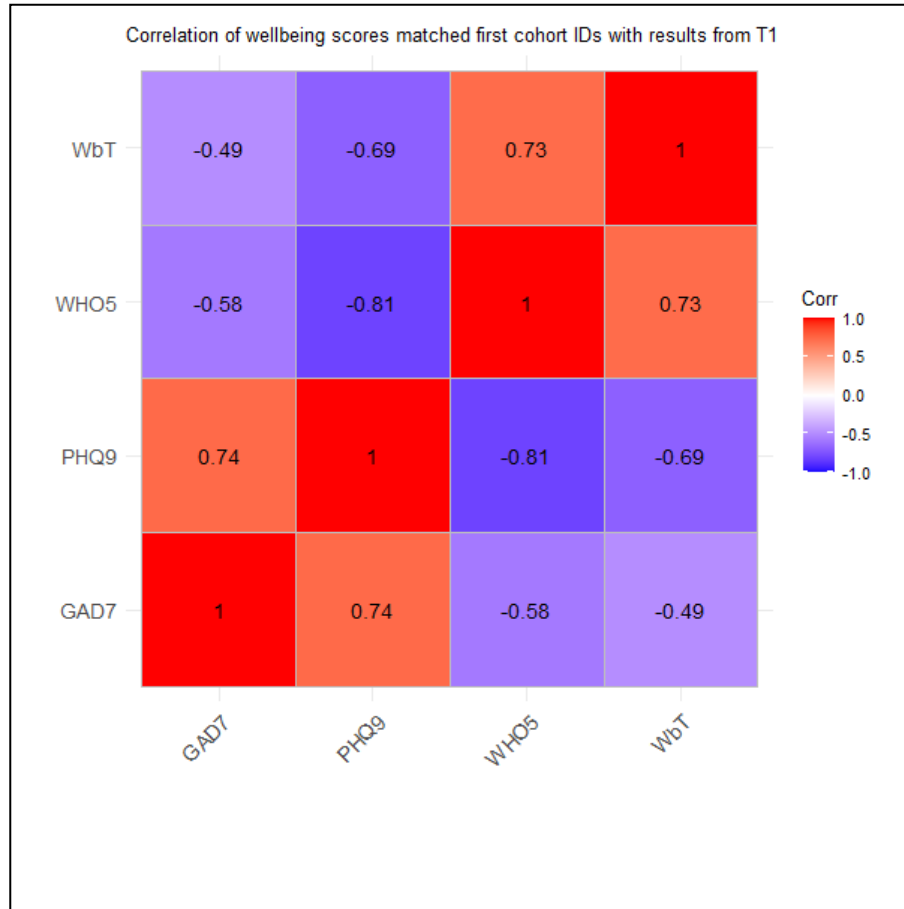

B. Cohort 1 Timepoint 2

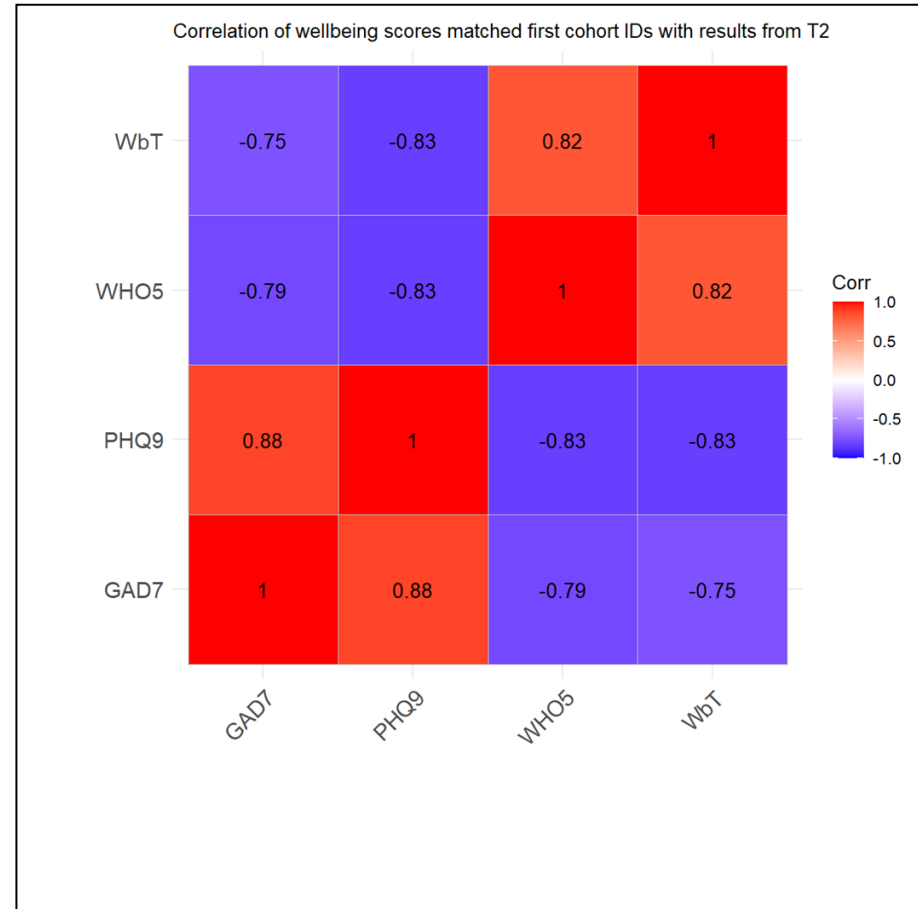

Supplement: Supplementary file 1 [file a62c84af816e8a51facc1cbc.pdf]
